# Supplementary material for: Layered Iron Vanadate as a High-Capacity Cathode Material for Nonaqueous Calcium-Ion Batteries
Source: MDPI journal article supplement (doi:10.3390/batteries7030054), 2021-08-09
Supplement: s1 [file s1]

# Supplementary Information

## **Layered Iron Vanadate as a High-Capacity Cathode Material for Nonaqueous Calcium-Ion Batteries**

Munseok S. Chae<sup>1</sup>, Dedy Setiawan<sup>1</sup>, Hyojeong J. Kim<sup>1</sup>, and Seung-Tae Hong<sup>1,2,\*</sup>

<sup>1</sup> Department of Energy Science and Engineering, DGIST (Daegu Gyeongbuk Institute of Science and Technology), Daegu 42988, Republic of Korea

<sup>2</sup> Energy Science and Engineering Research Center, DGIST, Daegu 42988, Republic of Korea

\*e-mail: [st.hong@dgist.ac.kr](mailto:st.hong@dgist.ac.kr)

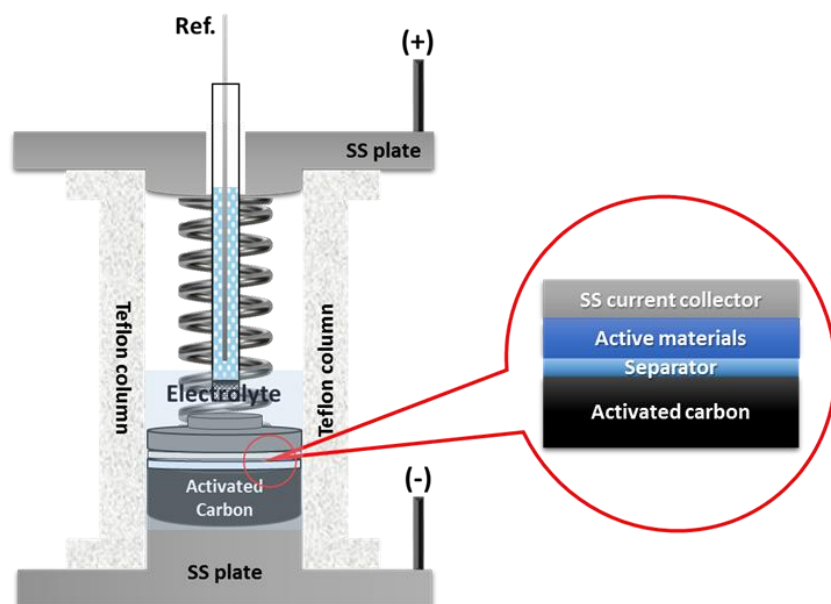

**Figure S1.** Scheme of the homemade cell used for electrochemical characterizations.

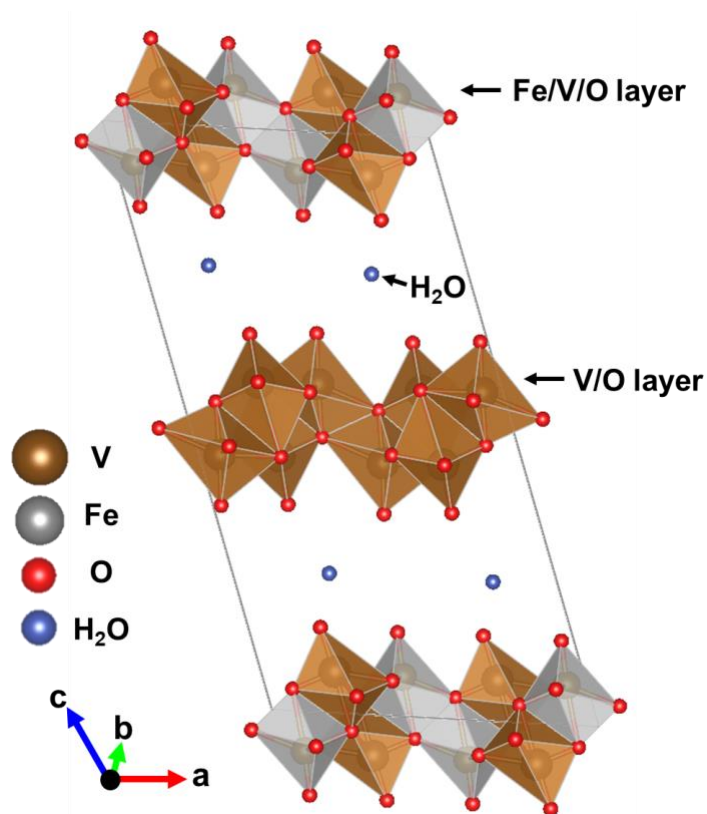

**Figure S2.** A proposed crystal structural model for  $\text{FeV}_3\text{O}_9 \cdot 1.2\text{H}_2\text{O}$ .

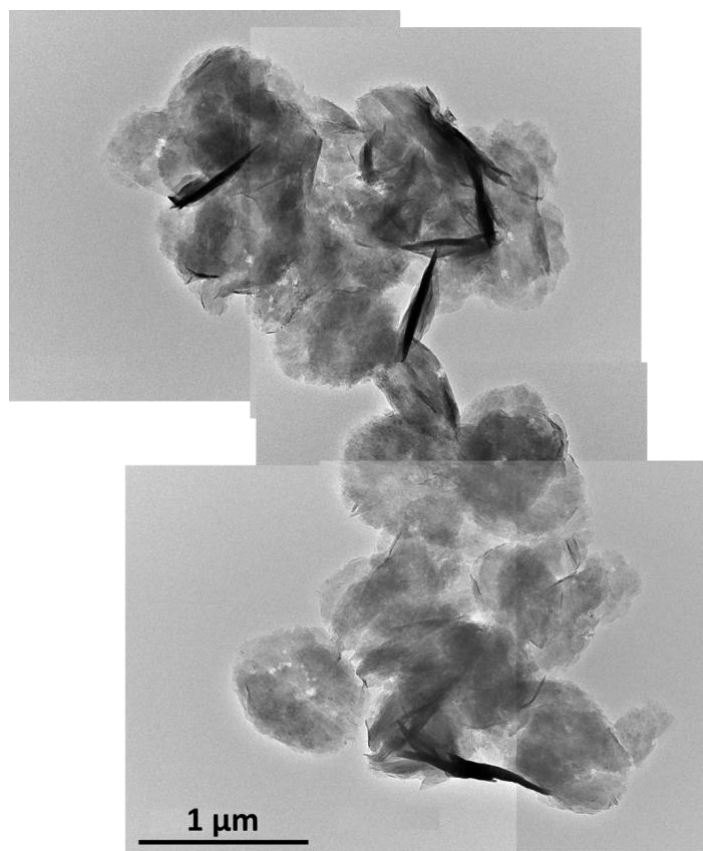

**Figure S3.** TEM images of the synthesized  $\text{FeV}_3\text{O}_9 \cdot 1.2\text{H}_2\text{O}$  particles.

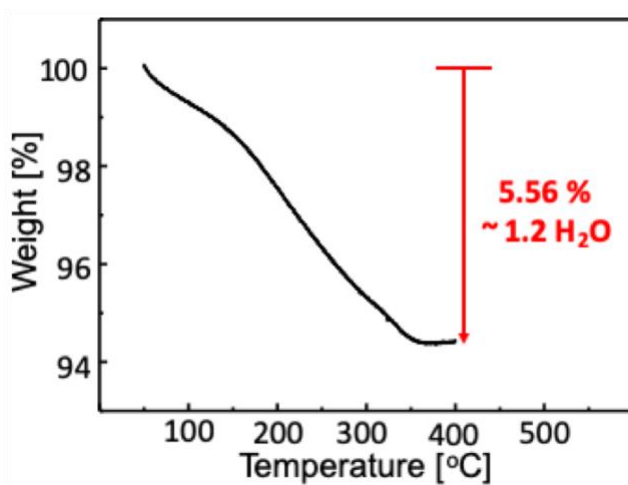

**Figure S4.** Thermogravimetric analysis for pristine  $\text{FeV}_3\text{O}_9 \cdot 1.2\text{H}_2\text{O}$  sample under nitrogen flowing atmosphere.

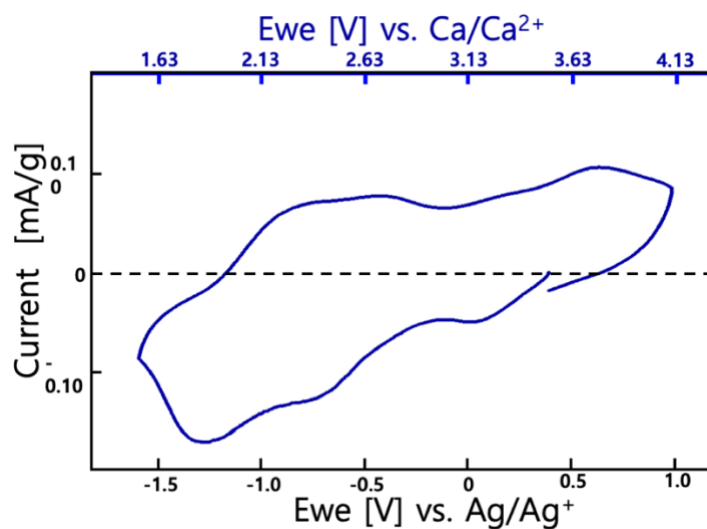

**Figure S5.** CV of  $\text{FeV}_3\text{O}_9 \cdot 1.2\text{H}_2\text{O}$  electrode at  $0.2 \text{ mV s}^{-1}$  in  $0.5 \text{ M Ca}(\text{ClO}_4)_2$  in AN with  $\text{Ag}/\text{Ag}^+$  reference electrode in a three-electrode system.

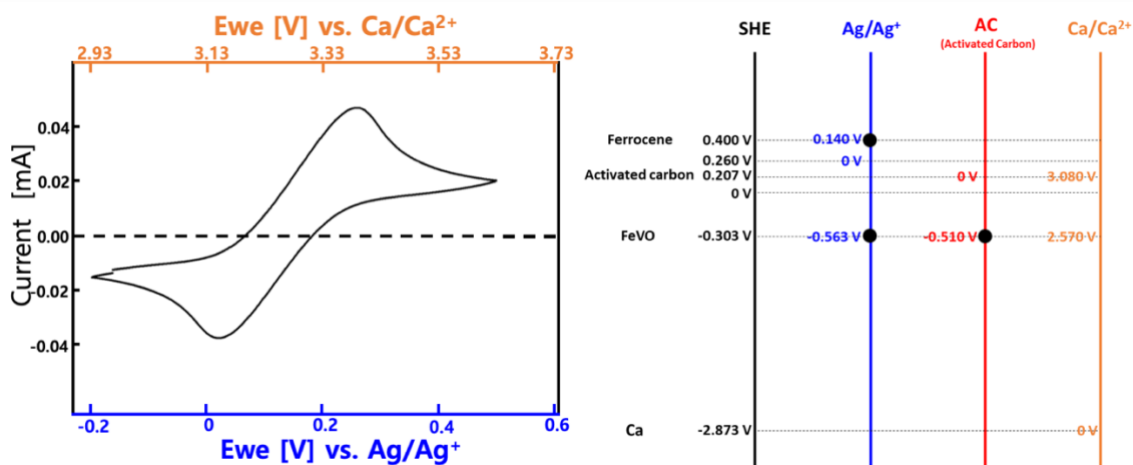

**Figure S6.** Ferrocene/ferrocenium redox couple CV test to estimate the AC voltage vs  $\text{Ca}/\text{Ca}^{2+}$ .

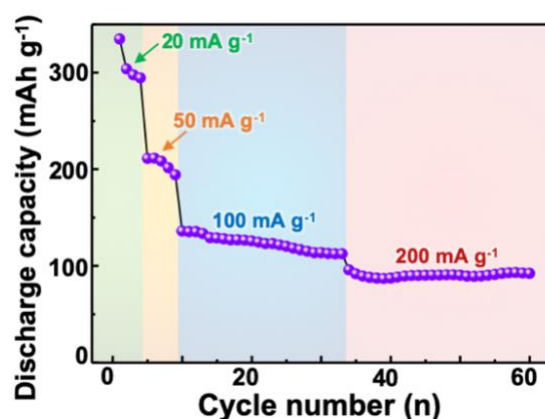

**Figure S7.** Cycle performance with various C-rates.

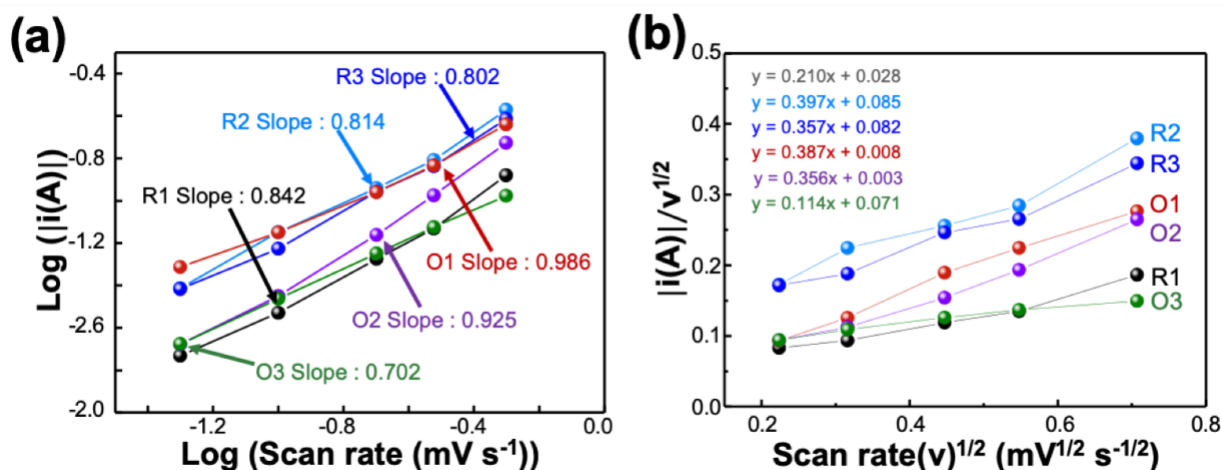

**Figure S8.** (a) Log–log plot of cathodic/anodic peak current dependence on the scan rate. (b) Plot of peak current ( $i/v^{1/2}$ ) dependence on the square root of scan rate ( $\text{mV}^{1/2} \text{ s}^{-1/2}$ ). According to Power's law,[1] the scan rate dependence of the CV current can be expressed as the equation:[1,2]:  $i = av^b$ , where  $i$  is the current (measured in A),  $v$  is the scan rate ( $\text{mV s}^{-1}$ ), and  $a$  and  $b$  are the adjustable parameters. The  $b$ -value can be determined by the slope of the  $\log(v)$  versus  $\log(i)$  plots, and generally between 0.5–1.0 (a). The estimated  $b$ -value is 0.5 for an ideal diffusion-controlled Faradaic intercalation reaction, 1.0 for a non-Faradaic capacitive process, and an intermediate value suggests a combined charge-storage reaction mechanism. Quantification of each contribution can be estimated using the method proposed by Dunn et al.,[1] from the linear plot of  $i(V) v^{-1/2}$  vs.  $v^{1/2}$  (b). For each of the scan rates, the intercalation and adsorption contributions were calculated. Figure 2e is the contribution ratio for the R2 peak current, for example.

1. Wang, J.; Polleux, J.; Lim, J.; Dunn, B. Pseudocapacitive contributions to electrochemical energy storage in  $\text{TiO}_2$  (anatase) nanoparticles. *J. Phys. Chem. C* **2007**, *111*, 14925–14931.
2. Yin, H.; Song, C.; Wang, Y.; Li, S.; Zeng, M.; Zhang, Z.; Zhu, Z.; Yu, K. Influence of morphologies and pseudocapacitive contributions for charge storage in  $\text{V}_2\text{O}_5$  micro/nano-structures. *Electrochim. Acta* **2013**, *111*, 762–770.

**Table S1.** Elemental ratios estimated from ICP analysis for  $\text{FeV}_3\text{O}_9 \cdot 1.2\text{H}_2\text{O}$  sample.

|                                                                    | Mass ratio (%) |      |      | Relative atomic ratio |     |      |
|--------------------------------------------------------------------|----------------|------|------|-----------------------|-----|------|
|                                                                    | Ca             | Fe   | V    | Ca                    | Fe  | V    |
| Sample                                                             |                |      |      |                       |     |      |
| Pristine<br>$\text{FeV}_3\text{O}_9 \cdot 1.2(\text{H}_2\text{O})$ | 0.00           | 26.6 | 73.4 | 0.0                   | 5.0 | 15.0 |

**Table S2.** Elemental ratios estimated from ICP analysis for the pristine  $\text{FeV}_3\text{O}_9 \cdot 1.2\text{H}_2\text{O}$ , first discharged, and first charged electrodes.

|                                                                                   | Mass ratio (%) |      |      | Relative atomic ratio |     |    |
|-----------------------------------------------------------------------------------|----------------|------|------|-----------------------|-----|----|
|                                                                                   | Ca             | Fe   | V    | Ca                    | Fe  | V  |
| Sample                                                                            |                |      |      |                       |     |    |
| Pristine<br>$\text{FeV}_3\text{O}_9 \cdot 1.2\text{H}_2\text{O}$                  | 0.0            | 26.6 | 73.4 | 0.0                   | 5.0 | 15 |
| Discharged<br>$\text{Ca}_{1.9}\text{FeV}_3\text{O}_9 \cdot 1.2\text{H}_2\text{O}$ | 26.5           | 19.5 | 54.0 | 1.9                   | 5.0 | 15 |
| Charged<br>$\text{Ca}_{0.2}\text{FeV}_3\text{O}_9 \cdot 1.2\text{H}_2\text{O}$    | 3.64           | 25.8 | 70.5 | 0.2                   | 5.0 | 15 |
